# Supplementary material for: A novel sea surface pCO 2 -product for the global coastal ocean resolving trends over the 1982–2020 period
Source: Copernicus journal article supplement (doi:10.5194/essd-2023-228), 2023-06-26
Supplement: Supplementary file 1 [file essd-2023-228-supplement.pdf]

**Table S1: Bias (mean of the residuals between the reconstructed coastal pCO<sub>2</sub>-product and SOCAT\_a, in  $\mu\text{atm}$ ), Root Mean Square Error (RMSE,  $\mu\text{atm}$ ) and  $r^2$  calculated for each year. The number of grid cells used for the comparison is also provided.**

|            | bias<br>( $\mu\text{atm}$ ) | RMSE<br>( $\mu\text{atm}$ ) | $r^2$ | cells  |
|------------|-----------------------------|-----------------------------|-------|--------|
| 1982-12020 | 0                           | 29                          | 0.7   | 472134 |
| 1982       | 2                           | 19                          | 0.7   | 568    |
| 1983       | 4                           | 16                          | 0.7   | 209    |
| 1984       | -1                          | 14                          | 0.6   | 341    |
| 1985       | 5                           | 18                          | 0.3   | 192    |
| 1986       | -1                          | 15                          | 0.7   | 310    |
| 1987       | -6                          | 32                          | 0.4   | 456    |
| 1988       | -1                          | 27                          | 0.6   | 323    |
| 1989       | -2                          | 42                          | 0.5   | 453    |
| 1990       | 2                           | 26                          | 0.2   | 181    |
| 1991       | 0                           | 17                          | 0.8   | 1094   |
| 1992       | 2                           | 16                          | 0.7   | 1176   |
| 1993       | 4                           | 31                          | 0.5   | 2067   |
| 1994       | -1                          | 25                          | 0.5   | 2939   |
| 1995       | 0                           | 25                          | 0.8   | 6220   |
| 1996       | 1                           | 29                          | 0.7   | 5130   |
| 1997       | 3                           | 33                          | 0.8   | 4928   |
| 1998       | 2                           | 29                          | 0.7   | 5259   |
| 1999       | 0                           | 32                          | 0.7   | 5183   |
| 2000       | -2                          | 33                          | 0.7   | 6289   |
| 2001       | -1                          | 34                          | 0.7   | 7055   |
| 2002       | 3                           | 27                          | 0.6   | 8833   |
| 2003       | -3                          | 25                          | 0.8   | 8772   |
| 2004       | -1                          | 27                          | 0.8   | 12276  |
| 2005       | -1                          | 25                          | 0.7   | 14980  |
| 2006       | 1                           | 28                          | 0.7   | 22512  |
| 2007       | 2                           | 29                          | 0.7   | 21724  |
| 2008       | 2                           | 27                          | 0.8   | 19784  |
| 2009       | 1                           | 31                          | 0.7   | 18313  |
| 2010       | 0                           | 29                          | 0.7   | 21149  |
| 2011       | 0                           | 34                          | 0.7   | 27382  |
| 2012       | -2                          | 31                          | 0.7   | 24474  |
| 2013       | -1                          | 31                          | 0.7   | 21674  |
| 2014       | 0                           | 32                          | 0.7   | 27817  |
| 2015       | 0                           | 30                          | 0.7   | 28386  |
| 2016       | 1                           | 25                          | 0.7   | 29319  |
| 2017       | 2                           | 27                          | 0.8   | 34210  |
| 2018       | 1                           | 28                          | 0.7   | 30488  |
| 2019       | -1                          | 31                          | 0.7   | 29283  |
| 2020       | -2                          | 31                          | 0.7   | 20367  |

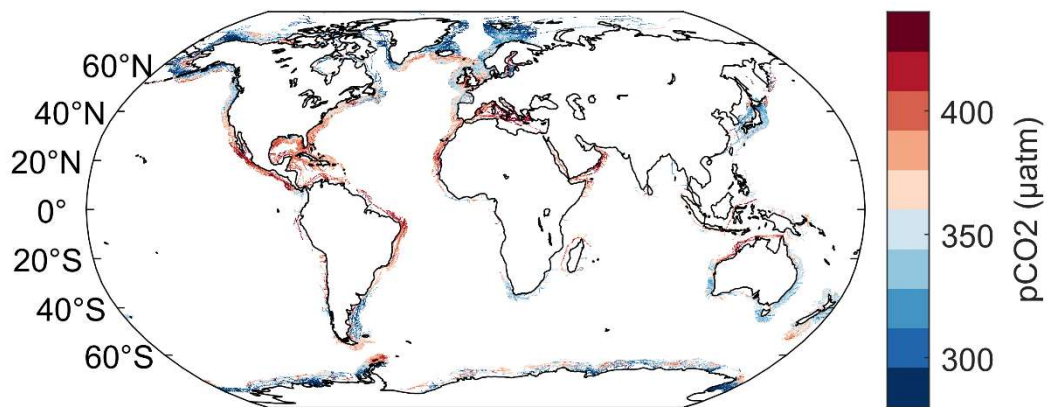

10

Figure S1. Global map of the climatological (1982-2020 period) averaged gridded sea surface coastal  $p\text{CO}_2$  ( $\mu\text{atm}$ ) from the SOCATv2022 database used as an independent dataset against for which the reconstructed coastal  $p\text{CO}_2$ -product is evaluated (SOCAT\_b).

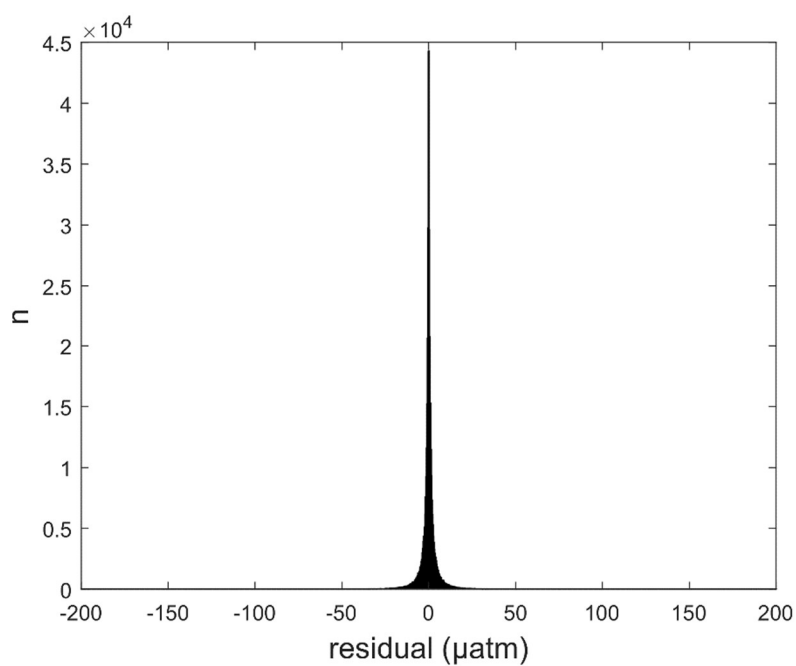

15 Figure S2. Histogram of the  $p\text{CO}_2$  residuals (in  $\mu\text{atm}$ ) between SOCAT\_b and SOCAT\_a.

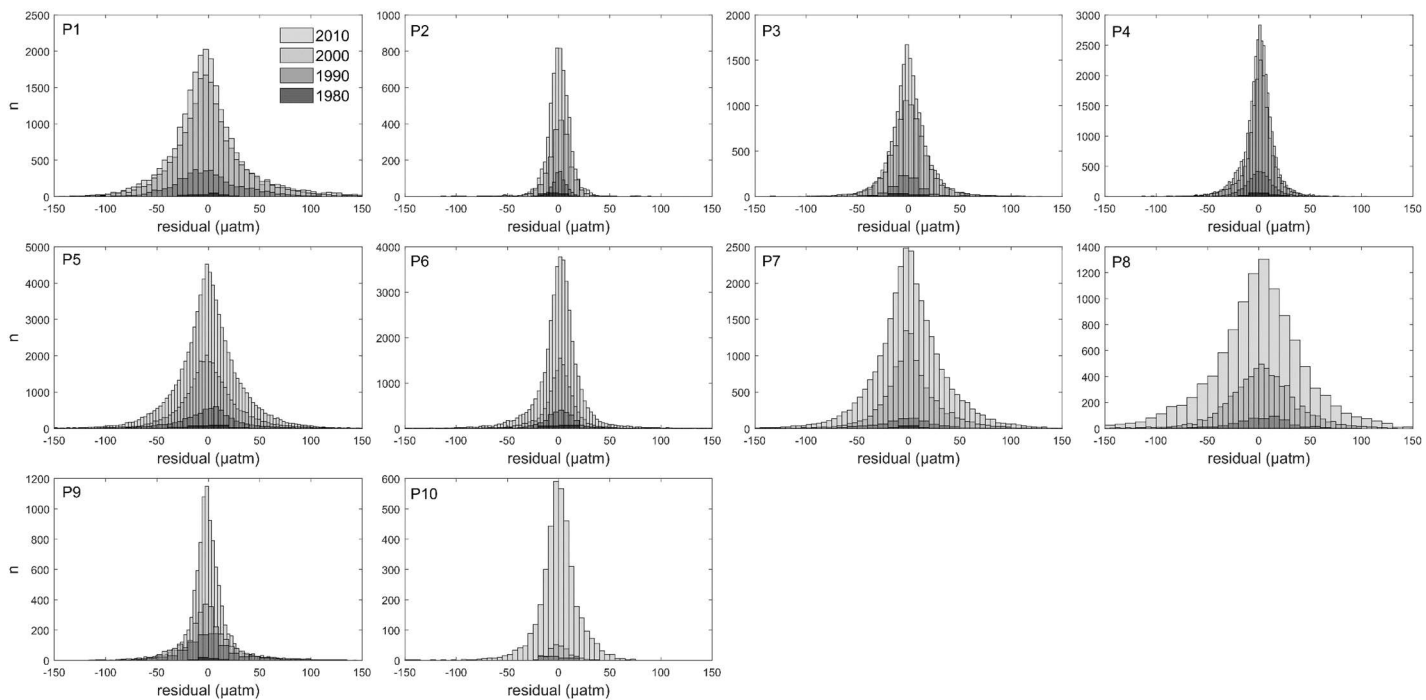

**Figure S3: Histograms of the residuals (in  $\mu\text{atm}$ ) between the reconstructed coastal  $\text{pCO}_2$ -product and SOCAT\_b for each of the four decades in each biogeochemical province.**
