# Supplementary material for: A novel sea surface pCO 2 -product for the global coastal ocean resolving trends over the 1982–2020 period
Source: Copernicus journal article supplement (doi:10.5194/essd-2023-228), 2023-06-26
Supplement: Supplementary file [file essd-2023-228-AC1-supplement.pdf]

## **Reviewer #2 Evaluations:**

Thank you for the opportunity to review "A novel sea surface partial pressure of carbon dioxide (pCO<sub>2</sub>) data product for the global coastal ocean resolving trends over the 1982-2020 period"

### **Summary and overall impression**

The paper is well written. It highlights one of the potential sources of differences in existing global pCO<sub>2</sub>-products as they do not explicitly include the coastal ocean and the ones that do, cannot yet sufficiently capture the specific and changing conditions occurring along the coastal domain and only provide a climatology covering a relatively short period of time. The authors propose a resolution by addressing these shortcomings of the original global coastal pCO<sub>2</sub>-product by Laruelle et al. (2017) which was limited to the 1998-2015 period and expanding it to a much longer period (1982-2020) while updating the methodology to resolve long-term trends in global pCO<sub>2</sub>.

I strongly endorse the utilisation of two-step machine learning approaches for estimating sea surface pCO<sub>2</sub> such as SOM-FFN where the authors first created biogeochemical clusters or provinces using SOM, and secondly, within each province identified in the step 1, established FFN-based nonlinear relationships between the observed sea surface pCO<sub>2</sub> and independent environmental variables or drivers. The methodology setup is well explained.

However, I have made a few comments about some confusing terms, which I believe should be addressed quickly before publication. Overall, I enthusiastically recommend publication of the manuscript.

Author's response: We would like to express our gratitude for your thorough review of our manuscript. We are particularly grateful for your constructive feedback regarding potentially confusing terms. We will in the following address these concerns to improve the clarity and precision of our work. Changes to the original manuscript were made using Word's "track changes" option, and the line numbers indicated in our responses refer to the revised version of the manuscript.

Please also note that we updated the ULB-SOM-FFN-coastalv2 pCO<sub>2</sub> and FCO<sub>2</sub> products to address a small issue related to the sea-ice product, which was identified while working on these revisions. All figures, tables, and numbers in the text were thus updated to account for this correction but our results are only marginally modified, and our discussion and conclusions thus remain unchanged.

On behalf of the co-authors,

Alizée Roobaert

### **General Comments:**

**R2C1: I understand that 1998-2015 (Laruelle et al., 2017) is relatively short to evaluate the long-term trends of the coastal air-sea CO<sub>2</sub> fluxes, but how can this period not be suitable to evaluate inter-annual variability as you mentioned? Given that it is 19 years of observations, can you elaborate more on this point? For example, how do you define "long-term trend"?**

R2R1: We agree with this point raised both by R2R1 and R1R1 regarding the need for a more precise definition of the temporal scales used. Here, we first repeat our definition supplied in response to R1R1 as it strongly relates to the comment raised here: In this study, we have established a "long-term trend" or "multidecadal trend" as a linear trend that spans a period exceeding 10 years. In our case, this trend encompasses the years 1982 to 2020, resulting in a total of 39 years of observations. The term "decadal trend" is employed to describe a linear trend derived from a time series spanning 10 years, while "interannual variability" refers to the year-to-year fluctuations. Based on the given definitions, we concur with R2C1 that the period covered by the Laruelle et al. (2017) product (1998-2015) is appropriate for evaluating interannual variability and, to a lesser extent, for examining trends over a single decade. However, it is important to note that the product published and discussed by Laruelle et al. (2017) only provides a monthly climatology averaged over the period 1998-2015 and does not analyze interannual variability. This limitation is a key motivation for updating the Laruelle et al. (2017) product in our study. The purpose of this update is to facilitate investigations into changes in sea surface pCO<sub>2</sub> and FCO<sub>2</sub> in the global coastal ocean across a wide range of temporal scales, encompassing both short-term interannual variability and longer-term variations. While our present study primarily offers a concise overview of long-term variations, it does not delve into specific analyses focused on decadal and interannual timescales.

Based on this comment and R1C1, we modified the text with a more precise definition of the different temporal scales used in this study.

Lines 18-21: ‘This product however has shortcomings because it only provides a climatology covering a relatively short period (1998-2015), thus hindering its application to the evaluation of the interannual variability, decadal changes and the long-term trends of the coastal air-sea CO<sub>2</sub> exchange, a temporal evolution that is still poorly understood and highly debated.’

Lines 28-30: ‘Our results also show that the temporal trend-changes in the air-sea pCO<sub>2</sub> gradient plays a significant role in the decadal long-term evolution of the coastal CO<sub>2</sub> sink, along with wind speed and sea-ice coverage changes that can also play an important role in some regions, particularly at high latitudes.’

Lines 35-39: ‘Advancements in understanding the coastal air-sea CO<sub>2</sub> exchange (FCO<sub>2</sub>) have been made, but change over different temporal scales (i.e., interannual and decadal changes as well as long-term temporal trends) remain unclear. Our research, based on observations and a machine learning approach, reconstructs the longest global time series of coastal FCO<sub>2</sub> (1982 to 2020). Results show the coastal ocean acts as a CO<sub>2</sub> sink, with increasing intensity over time. This new coastal FCO<sub>2</sub> product allows establishing regional carbon budgets and provides new constraints for closing the global carbon cycle.’

Lines 101-107: ‘Using ULB-SOM-FFN-coastalv2 that relies on ~ 18 million coastal direct observations from the SOCATv2022 database, we recalculate the coastal air-sea CO<sub>2</sub> exchange (FCO<sub>2</sub>) for the 1982-2020 period and briefly describe the long-term trend temporal evolution of the global coastal CO<sub>2</sub> sink over this timeframe. The long-term trend “or “multidecadal trend” in this study is defined as a linear trend that spans a period exceeding 10 years that is in our case a trend that encompasses the years 1982 to 2020, resulting in a total of 39 years of observations. This study does not discuss the decadal change (period of 10 years) and interannual variabilities (years-to-years fluctuations) of the global coastal sink.’

Line 447: ‘3.3.2 Decadal-long-term trends in the coastal CO<sub>2</sub> sink ’

Lines 449-453: ‘Our results reveal significant spatial heterogeneities between the long-term temporal FCO<sub>2</sub> trends (linear trends that spans over 39 years) observed within different coastal regions, a finding consistent the range of varying slopes (including changes in sign of the slopes) already reported in local regional and discontinuous global studies (e.g., Becker et al., 2021; Laruelle et al., 2018; Wang et al., 2017). Our results also show that the decadal-rates of changes in ΔpCO<sub>2</sub> and FCO<sub>2</sub> follow each other (compare Figs. 6a with 6b).’

Lines 463-466: ‘Although our results suggest that the decadal-long-term change in FCO<sub>2</sub> intensity mainly results from that of the ΔpCO<sub>2</sub> (compare Fig. 6a with 6b), the rate of change in FCO<sub>2</sub> can be amplified or dampened in some regions by changes in wind speed patterns and/or sea-ice coverage (through their effect on Eq. (1)), in agreement with recent findings by Resplandy et al. (2023).’

Lines 468-500: ‘~~However,~~ Taking also the large heterogeneity in decadal-the long-term FCO<sub>2</sub> trends, a quantitative analysis of the respective contributions of different coastal systems to the global strengthening of the coastal CO<sub>2</sub> sink should also be performed in the future, using a regionalized approach.’

Lines 446-448: ‘However, this product was not designed or evaluated regarding its ability to resolve the interannual and decadal variabilities and the long-term evolution of the coastal air-sea CO<sub>2</sub> exchange, which are still poorly understood (e.g., Bauer et al., 2013; Lacroix et al., 2021a; Laruelle et al., 2018; Regnier et al., 2013; Regnier et al., 2022; Resplandy et al., in rev.; Wang et al., 2017).’

Lines 552-555: ‘We also provided a new coastal air-sea CO<sub>2</sub> exchange product for the same period and examined the long-term trends that is to say the temporal evolution of the global coastal CO<sub>2</sub> sink over the past four decades. This analysis reveals that the long-term temporal trend of the air-sea pCO<sub>2</sub> gradient drives most of the decadal-long-term evolution of the coastal CO<sub>2</sub> sink, wind speed and sea-ice coverage playing a significant role regionally.’

Lines 562-564: ‘In the future, our machine-learning approach could also be used to diagnose the main drivers of change in the global coastal ocean sink and more specifically, changes in the decadal-long-term trends evolution of the coastal pCO<sub>2</sub> field.’

In Fig.4’s caption: ‘...For each region, we report the bias (μatm), RMSE (μatm) and number of cells for the calculation between the reconstructed pCO<sub>2</sub>-product and SOCAT\_b as well as their respective long-term pCO<sub>2</sub> trend (in μatm decade<sup>-1</sup>, which is calculate first as the slope of a linear trend using the monthly median values of all the deseasonalized data).’

In Fig. 6’s caption: ‘Figure 6. Long-term trend ofRate-of-change-in (a) the coastal FCO<sub>2</sub> (in mol C m<sup>-2</sup> yr<sup>-1</sup> decade<sup>-1</sup>), (b) the air-sea pCO<sub>2</sub> gradient (ΔpCO<sub>2</sub>, in μatm decade<sup>-1</sup>), (c) the wind speed at 10 meters above the sea surface (m s<sup>-1</sup> decade<sup>-1</sup>) and (d) the sea-ice coverage (decade<sup>-1</sup>) from 1982 to 2020. For each panel, the rate-change-long-term trend is calculated as the slope of a linear regression on the monthly median values of all the deseasonalized data from 1982 to 2020. We only present grid cells where a significant trend is detected based on a Mann-Kendall statistical test.’

## Specific and Minor Comments:

**R2C2:** Line 131: "... each 0.25° cell is allocated to one of the 10 provinces (or neurons)." The content of the parenthesis, "or neurons" does not line up with the full sentence. It looks as if biogeochemical provinces/clusters were also neurons. A province is a self-organised map (SOM), a lattice of neurons or a single-layer neural network. I understand you referenced Landschutzer et al. (2013, 2014) which provide more details, but I suggest a revision of this segment to avoid confusion.

R2R2: We agree with R2C2 that the content of the parenthesis does not line up and to avoid confusion we modified the text to '... to one of the 10 provinces defined by the SOM'.

**R2C3:** Lines 297-298: "... since the algorithm minimizes the Root Mean Square Error (RMSE) between measurements and target observations." There seems to be some confusion here. Isn't the algorithm supposed to minimize the RMSE between "reconstructed values" and "target observations"?

R2R3: We agree with R2C3 and modified the term 'measurements' with 'reconstructed values'. This has also been considered in other parts of the text.

Lines 312-315: 'A global mean of the residuals (bias) value of 0  $\mu\text{atm}$  and a [coefficient of determination \( \$r^2\$ \)](#) of 0.7 are calculated, as expected since the algorithm minimizes the Root Mean Square Error (RMSE) between ~~measurements~~ [the reconstructed  \$\text{pCO}\_2\$](#)  and target  [\$\text{pCO}\_2\$](#)  observations.'

**R2C4:** In Fig 3a-b, the similarity of the shape and spread of the four histograms of the residuals between decades raises questions on how you obtained the two sets of data SOCAT\_a (80%) and SOCAT\_b(20%). Since you randomly divided the original dataset to obtain them (Lines 179-182), how can you explain the "perfect" representation of data across the four decades?

R2R4: In this study, we use two distinct subsets of surface  $\text{fCO}_2$  measurements from the SOCATv2022 database. The first set (SOCAT\_a) is used for training the FFN whereas the second set (SOCAT\_b) is used to validate our reconstructed  $\text{pCO}_2$  derived from the FFN. Both these two sets have been created by randomly dividing the ~ 32 million  $\text{CO}_2$  measurements into a group of 80 % of the original dataset (SOCAT\_a) and a second group (SOCAT\_b, 20 % of the original dataset). The large number of SOCAT data available to create the two subsets is enough to ensure that each is large enough to be fairly representative of the entire SOCAT dataset. These two sets of data are then gridded for each month at 0.25° using the average of all  $\text{fCO}_2$  values in each cell. Values are then converted from  $\text{fCO}_2$  to  $\text{pCO}_2$  using the equation of Takahashi et al. (2019, page 67) and a coastal mask is applied on both gridded  $\text{pCO}_2$  products. We agree with R2C4 that the shape and spread of the four histograms of the residual between Fig. 3a and Fig. 3b looks perfectly identical. One conclusion that could be drawn from it is that the neural network reconstruction is able to generalize the available measurements and thus is not overfitting the 80 % training data. One may also conclude that random division of the data does not guarantee independence and thus the 20 % independent measurements are reconstructed well as a result of the known autocorrelation length scales among measurements (Jones et al., 2012). However, we would also like to note that there are distinct features visible between these two figures that show differences that are visible for the first decade in the 80' 90'. Nevertheless, this example highlights the importance of independent data testing and - following the suggestion of referee 1, we have added a comparison to 3 buoy timeseries - see comment R1C1.

We now also modified the text in Sect. 2.1 to clarify how SOCAT\_a and SOCAT\_b have been calculated:

Lines 174-187: 'The surface  $\text{pCO}_2$  data ~~used by the FFN~~ are extracted from the SOCATv2022 database (Bakker et al., 2022) that originally contains ~ 40 million  $\text{pCO}_2$  measurements for the entire global ocean (open and coastal seas combined). [We randomly divide this dataset into two independent datasets: a group of data used for the FFN algorithm \(SOCAT\\_a, see below\) and a group of data that we use to validate our reconstructed  \$\text{pCO}\_2\$  \(SOCAT\\_b\). To do so, from the SOCATv2022 database.](#) ~~We~~ we follow the recommendation of the SOCAT community and use their accuracy criteria to only retain the data with the highest accuracy. To do so, we first select sea surface measurements expressed in fugacity of  $\text{CO}_2$  ( $\text{fCO}_2$ ) with a quality flag ranging from A to D (which corresponds to an estimated accuracy better than 5  $\mu\text{atm}$ ) and a World Ocean Circulation Experiment (WOCE) flag of 2 (good dataset following SOCAT) for the 1982-2020 period. Following Laruelle et al. (2017), we also remove  $\text{fCO}_2$  values < 30  $\mu\text{atm}$  and > 1000  $\mu\text{atm}$  that are likely derived from estuarine or fresh water systems that are not included in our coastal domain. We then randomly divide this dataset rich of ~ 32 million  $\text{fCO}_2$  measurements into a group of data used for the FFN algorithm ('a', 80 % of the original dataset) and a group of data that we use to validate our reconstructed  $\text{pCO}_2$  ('b', 20 % of the original dataset). The two sets of data (SOCAT\_a and SOCAT\_b) are then gridded for each month at 0.25° using the average of all  $\text{fCO}_2$  values in each cell. Values are then converted from  $\text{fCO}_2$  to  $\text{pCO}_2$  using the equation of Takahashi et al. (2019, page 67) and a coastal mask is applied on both gridded  $\text{pCO}_2$  products'

**R2C5:** Given that “the spatial extension of the provinces varies from one month to the other because of the seasonal variations of the environmental drivers”, I suggest an update of the caption of Table 2 to be specific with the “biogeochemical provinces” on which spatial evaluation is performed.

R2R5: We agree with the reviewer that the caption of Table 2 was unclear considering that the spatial extension of the biogeochemical provinces varies from one month to the other. For each province, statistical analyses are performed each month using all of the cells of the province over the entire 1982-2020 period thus accounting for temporal variations of the spatial extent of the provinces. We updated the caption of Table 2 to stress out this point.

In Table 2’s caption: ‘Table 2: Statistical analyses (bias, RMSE and  $r^2$ ) of the reconstructed coastal  $p\text{CO}_2$ -product against  $p\text{CO}_2$  observations from SOCAT\_a and SOCAT\_b -for the different biogeochemical provinces. For each province, bias, RMSE and  $r^2$  are calculated using all of the monthly cells of the province for the period 1982-2020.’

**R2C6:** Lines 338-339: “This dataset consists of a pool of 404,206 gridded cells that are uniformly distributed between both hemispheres”. From reading this, it now seems clear that you randomly divided the gridded cells of the original dataset ( $p\text{CO}_2$  observations). If this is the case, provide a better explanation in Sect. 2.1 because this would clarify my earlier comments on Fig. 3a-b.

R2R6: Indeed, we have now provided more clarity in the text (see R2C4 above).

**R2C7:** Line 333: “can likely also explain”. The term “can explain” already implies a level of likelihood or possibility, so adding “likely” before it is unnecessary and redundant

R2R7: We agree with R2C7 and modified the text accordingly.

**R2C8:** Check the units of  $\Delta p\text{CO}_2$  and  $p\text{CO}_2$  throughout the manuscript. You put “atm” instead of “ $\mu\text{atm}$ ”. See Lines 226-227, for example.

R2R8: The units of the atmospheric and oceanic  $p\text{CO}_2$  are always expressed in  $\mu\text{atm}$  in the Text, Figures and Tables. The units of  $\Delta p\text{CO}_2$  are also expressed in  $\mu\text{atm}$  when its long-term change is discussed ( $\mu\text{atm decade}^{-1}$ , Fig. 6). We just expressed the units of  $\Delta p\text{CO}_2$  in atm when used in Eq. (1) to calculate a  $\text{FCO}_2$  expressed in  $\text{mol m}^{-2} \text{yr}^{-1}$ . We thus consider that no change must be done for the units of  $p\text{CO}_2$  and  $\Delta p\text{CO}_2$  in the text.

**R2C9:** Line 140: “South Hemisphere” should be read “Southern Hemisphere”.

R2R9: We agree with R2C9 and modified the text accordingly.

**R2C10:** Line 147: “a target variable” should be read “the target variable” given that it is known.

R2R10: We agree with R2C10 and modified the term accordingly.

**R2C11:** Line 157: instead of “calculate”, I suggest you use “estimate” as it sounds more appropriate.

R2R11: Following R2C3, we decided to use ‘reconstruct’ instead of ‘calculate’ to be consistent throughout the manuscript. This change is also considered in other places in the text to be consistent.

Lines 148-161: ‘In a second step, within each biogeochemical province identified in step 1 (SOM), a FFN algorithm establishes nonlinear relationships between the observed sea surface  $p\text{CO}_2$  and independent variables, or drivers, that are known to control its spatial and temporal variability. For each province, the FFN algorithm calculates relationships between the observed target variable (here  $p\text{CO}_2$  using  $p\text{CO}_2$  observations from the SOCAT\_a dataset - see below) and inputs (environmental drivers - see below and Table 1) by adjusting weighting factors of a sigmoid activation function (one sigmoid function per neuron in the hidden layer) following an iterative procedure, i.e., a Levenberg-Marquardt backpropagation algorithm. At the first iteration, the weights of neurons are randomly assigned and the estimated-reconstructed  $p\text{CO}_2$  is compared with the actual  $p\text{CO}_2$  observations. Based on the resulting mismatch, the network weights are iteratively updated in a way that the error function - in our case the mean squared error between network output and actual observations - gets minimized. For each iteration, the FFN algorithm uses a fraction of the  $p\text{CO}_2$  observations for the actual training of the network (i.e., the adjustment of the neuron weights), while another randomly selected fraction of the dataset is used to independently evaluate the performance of the algorithm. The final coefficients are obtained when the reconstructed  $p\text{CO}_2$  simulated from the validation data does not significantly improve relative to the  $p\text{CO}_2$  observations, to prevent overfitting. The final neuron weights and thus the resulting input-output relationships are used to reconstruct calculate  $p\text{CO}_2$  in each cell and for each month during the 1982-2020 period.’

**R2C12: Line 288: “see section 3.3.3” should be written “Sect. 3.3.3“ for consistency**

R2R12: we agree with R2C12 and modified the text accordingly.

**R2C13: Line 396: “southern Hemisphere” should be written “Southern Hemisphere“..**

R2R13: we agree with the reviewer and modified the text accordingly.

**R2C14: Line 406 and Fig. 6’s caption: “RMS” is used instead of “RMSE“. I suggest you check these also throughout the manuscript.**

R2R14: The Root Mean Square (RMS) is used on line 406 of the original manuscript and in Fig. 6’s caption since we evaluate and discuss the seasonal amplitude signal of the air-sea CO<sub>2</sub> exchange (and thus not an error term). The Root Mean Square Error (RMSE) in contrast is used when comparing two datasets and their respective differences (e.g., in this study when comparing our reconstructed pCO<sub>2</sub> and FCO<sub>2</sub> against the known truth or observed values). Therefore, no changes have been made to the manuscript in response to this comment.

Lines 443-446: ‘Finally, the seasonal coastal FCO<sub>2</sub> variability (expressed as the Root Mean Square (RMS) of the seasonal amplitude,) agrees with the few studies performed at global scale (see e.g., Dai et al., 2022; Roobaert et al., 2019) with high seasonal FCO<sub>2</sub> amplitudes (RMS values > 1.5 mol C m<sup>-2</sup> yr<sup>-1</sup>) at temperate and high latitudes and a low amplitude over the subtropical band (Fig. 5b).’

**R2C15: Line 407: “rms values” should be written “RMSE values”.**

R2R15: see R2C14

**R2C16: Line 487: “and can be display large variations the regional scale ...” This sentence needs revision.**

R2R15: we agree with the reviewer and revised the text:

Lines 529-531: ‘It should be noted that all these uncertainties are calculated globally and can be display large variations the regional scale (see e.g., Roobaert et al., 2019) as exemplified by the uncertainty associated with the choice of wind speed product on the FCO<sub>2</sub> calculation (see Roobaert et al., 2018).’

**R2C17: Line 495: “depend” instead of “depending”.**

R2R17: we agree with the reviewer and modified the text accordingly.

**R2C18: Line 496: “use“ instead of “used“.**

R2R18: We suppose that the reviewer refers to ‘used’ instead of ‘use’ and thus modified the text accordingly.

Lines 535-540: ‘Using the narrow definition of the coastal domain (i.e., the shelf break as the outer limit), we calculate a global value of 0.01 Pg C yr<sup>-1</sup> for  $\sigma_{FCO_2}$  (7 % uncertainty on the global FCO<sub>2</sub>, which is consistent with the global FCO<sub>2</sub> uncertainty calculated by Roobaert et al. (2019, 10 %)), 7 % FCO<sub>2</sub> difference depend on the k-formulation used ( $\sigma_k$  value of 0.01), 2 % difference on the FCO<sub>2</sub> calculation depending on the wind product choice ( $\sigma_{wind} = 0.002$  Pg C yr<sup>-1</sup>), 8 % for the sea-ice choice ( $\sigma_{ice} = 0.01$  Pg C yr<sup>-1</sup>), 36  $\mu$ atm for  $\theta_{map}$ , 8  $\mu$ atm for  $\theta_{grid}$  and 3  $\mu$ atm for  $\theta_{obs}$ .’

## REFERENCES

- Jones, S. D., C. Le Quere, and C. Rödenbeck (2012), Autocorrelation characteristics of surface ocean pCO<sub>2</sub> and air-sea CO<sub>2</sub> fluxes, *Global Biogeochem. Cycles*, 26, GB2042, doi:10.1029/2010GB004017
- Laruelle, G. G., Landschützer, P., Gruber, N., Tison, J. L., Delille, B., & Regnier, P. (2017). Global high-resolution monthly pCO<sub>2</sub> climatology for the coastal ocean derived from neural network interpolation. *Biogeosciences*, 14(19), 4545–4561. <https://doi.org/10.5194/bg-14-4545-2017>
- Takahashi, T., Sutherland, S. C., & Kozyr, A. (2019). Global ocean surface water partial pressure of CO<sub>2</sub> database: Measurements performed during 1957–2018 (version 2018). NOAA/NCEI/OCADS NDP-088 (V2018) Rep., 25 pp., [https://www.ncei.noaa.gov/access/ocean-carbon-data-system/oceans/LDEO\\_Underway\\_Database/NDP-088\\_V2018.pdf](https://www.ncei.noaa.gov/access/ocean-carbon-data-system/oceans/LDEO_Underway_Database/NDP-088_V2018.pdf).
